# Supplementary material for: Second line chemotherapy and visceral metastases are associated with poor survival in patients with mCRPC receiving 177Lu-PSMA-617
Source: PubMed Central journal article supplement (PMC6691377; doi:10.7150/thno.35759), 2019-07-09
Supplement: thnov09p4841s1.pdf [file thnov09p4841s1.pdf]

## Supplemental Material

**Supplementary table 1: patient characteristics of subgroups regarding liver metastases and cabazitaxel treatment**

| Parameters                        | LM+<br>CABA+ | IQR                | LM-<br>CABA+ | IQR               | LM+<br>CABA- | IQR               | LM-<br>CABA- | IQR               |
|-----------------------------------|--------------|--------------------|--------------|-------------------|--------------|-------------------|--------------|-------------------|
| Number of patients                | 15           |                    | 13           |                   | 19           |                   | 62           |                   |
| Age                               | 65.4         | (60.7-<br>73.4)    | 71.6         | (66.0-<br>75)     | 75.9         | (69.3-<br>79.3)   | 71.9         | (65.3-<br>77.6)   |
| Gleason score                     | 8            | (8-9)              | 8            | (7-9)             | 8            | (7-9)             | 8            | (7-9)             |
| ECOG                              | 0            | (0-2)              | 1            | (0.25-1)          | 1            | (0-1)             | 1            | (0-1)             |
| PSA (ng/ml)                       | 378.9        | (128.8-<br>2282.0) | 132.0        | (13.1-<br>542.5)  | 208.4        | (29.9-<br>561.4)  | 329.6        | (93.4-<br>977.0)  |
| ALP (U/l)                         | 330.5        | (171-<br>534.5)    | 172.0        | (73.5-<br>250.5)  | 94.0         | (66.0-<br>141.0)  | 185.0        | (89.3-<br>315.8)  |
| LDH (U/l)                         | 484.0        | (418.3-<br>783.8)  | 282.0        | (218.0-<br>294.0) | 277.0        | (219.0-<br>396.0) | 326.0        | (236.0-<br>510.0) |
| <b>Site of metastases</b>         | <b>Total</b> | <b>%</b>           | <b>Total</b> | <b>%</b>          | <b>Total</b> | <b>%</b>          | <b>Total</b> | <b>%</b>          |
| Bone                              | 15           | 100                | 12           | 92                | 17           | 89                | 55           | 88                |
| Lymph node                        | 13           | 87                 | 8            | 62                | 15           | 79                | 50           | 80                |
| Lung                              | 4            | 27                 | 2            | 15                | 5            | 26                | 12           | 29                |
| other                             | 0            | 0                  | 1            | 8                 | 1            | 5                 | 0            | 0                 |
| <b>Previous therapy of mCRPC</b>  | <b>Total</b> | <b>%</b>           | <b>Total</b> | <b>%</b>          | <b>Total</b> | <b>%</b>          | <b>Total</b> | <b>%</b>          |
| Docetaxel                         | 15           | 100                | 13           | 100               | 15           | 79                | 48           | 77                |
| Abiraterone                       | 13           | 87                 | 12           | 92                | 15           | 79                | 50           | 80                |
| Enzalutamide                      | 11           | 73                 | 13           | 100               | 17           | 89                | 51           | 82                |
| Both (Abiraterone & Enzalutamide) | 11           | 73                 | 12           | 92                | 13           | 68                | 42           | 68                |
| <sup>223</sup> Radium             | 3            | 20                 | 2            | 15                | 3            | 16                | 14           | 23                |
| EBRT-bone                         | 3            | 20                 | 3            | 20                | 10           | 53                | 10           | 16                |

LM=liver metastases; CABA=cabazitaxel treatment; PSA=prostate-specific antigen; ALP=alkaline phosphatase; LDH=lactate dehydrogenase; EBRT=external beam radiation; IQR=interquartile range

**Supplementary table 2: Survival parameters of patient subgroups regarding liver metastases and cabazitaxel treatment**

| Parameters                | LM+<br>CABA+ | CI<br>(95%) | LM-<br>CABA+ | CI<br>(95%) | LM+<br>CABA- | CI<br>(95%) | LM-<br>CABA- | CI<br>(95%) |
|---------------------------|--------------|-------------|--------------|-------------|--------------|-------------|--------------|-------------|
| Number of patients        | 15           |             | 13           |             | 19           |             | 62           |             |
| Deaths during observation | 12           | 80%         | 6            | 46%         | 14           | 73%         | 22           | 35%         |
| Median OS                 | 3.3          | (1.2-5.4)   | 13.2         | (0.8-25.6)  | 6.9          | (4.7-9.1)   | 16.4         | (8.2-24.7)  |
| Median PFS                |              |             |              |             |              |             |              |             |

LM=liver metastases; CABA=cabazitaxel treatment; PSA=prostate-specific antigen; ALP=alkaline phosphatase; LDH=lactate dehydrogenase; EBRT=external beam radiation; CI = confidence interval; PFS = progression free survival (PCSWG3 criteria,  $\geq 25\%$  and  $\geq 2\text{ng/ml}$  of nadir)

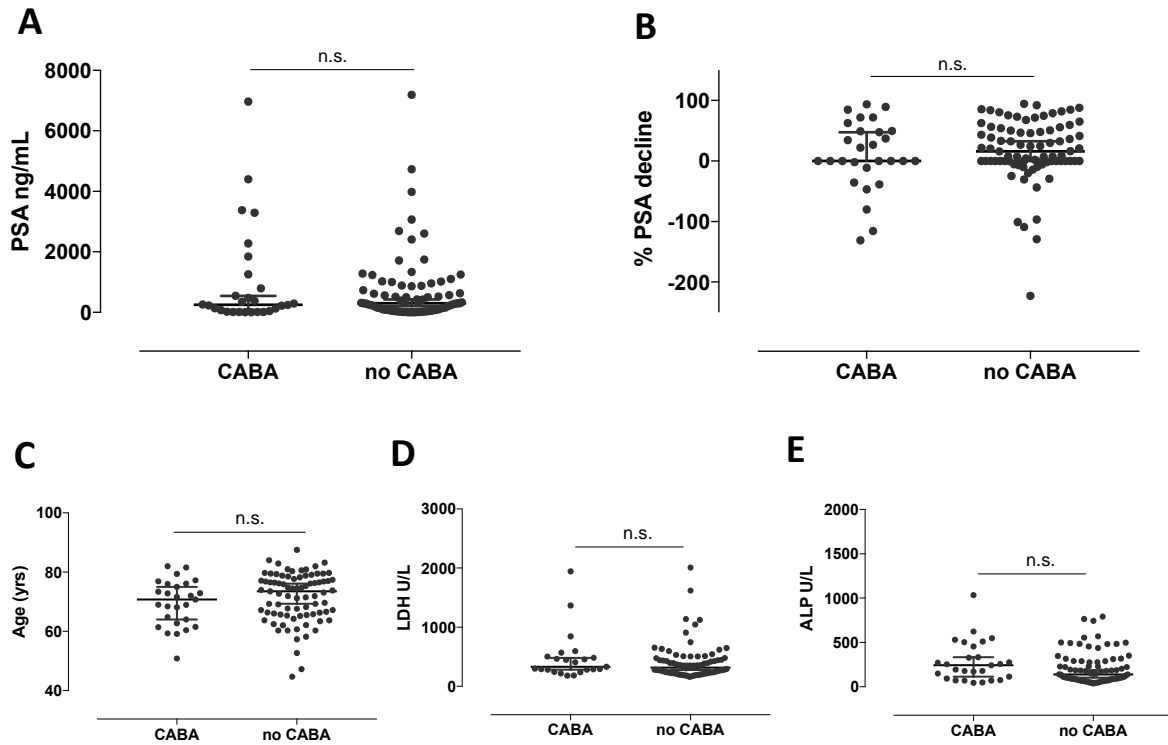

**Figure S1:** comparison of CABA-treated and untreated patients regarding different parameters. Dot plot comparisons are shown for PSA level (A) PSA response (B), age (C), LDH (D) and ALP (E). Both groups have been compared using a non-parametric t-test. PSA = prostate-specific antigen, LDH = lactate dehydrogenase; ALP = alkaline phosphatase; CABA = cabazitaxel; n.s. = not significant

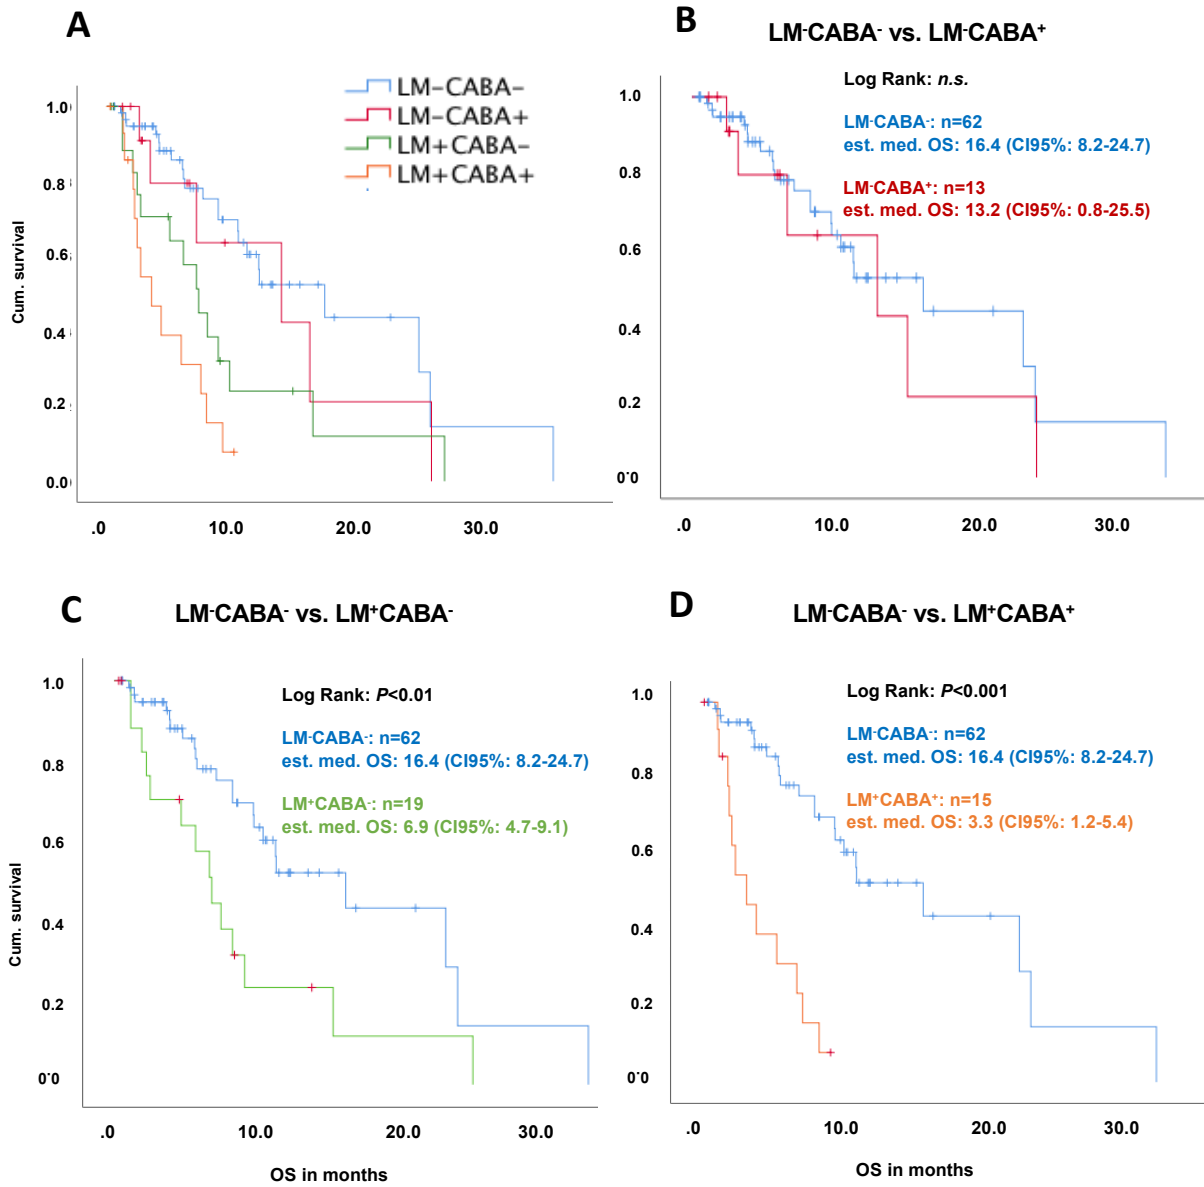

**Figure S2:** Kaplan-Meier survival analysis of four subgroups LM<sup>+</sup>CABA<sup>+</sup> (n=15); LM<sup>-</sup>CABA<sup>+</sup> (n=13), LM<sup>+</sup>CABA<sup>-</sup> (n=19) and LM<sup>-</sup>CABA<sup>-</sup> (n=62) (A). Individual comparisons of OS of LM<sup>-</sup>CABA<sup>+</sup> (B), LM<sup>+</sup>CABA<sup>-</sup> (C) and LM<sup>+</sup>CABA<sup>+</sup> (D) with LM<sup>-</sup>CABA<sup>-</sup>. LM = liver metastases, CABA = Cabazitaxel, OS = overall survival, cum. survival = cumulative survival
